# Supplementary material for: Preferential Neuronal Responses to Snakes in the Monkey Medial Prefrontal Cortex Support an Evolutionary Origin for Ophidiophobia
Source: Frontiers journal article supplement (doi:10.3389/fnbeh.2021.653250), 2021-03-24
Supplement: Data_Sheet_1.PDF [file Data_Sheet_1.PDF]

# Preferential neuronal responses to snakes in the monkey medial prefrontal cortex support an evolutionary origin for ophidiophobia

## Supplementary information

**Supplementary Table 1. Numbers of mPFC neurons, snake-responsive neurons, and striking-selective neurons recorded from individual monkeys.**

|                                   | Monkey1 | Monkey2 | Total |
|-----------------------------------|---------|---------|-------|
| No. of mPFC neurons               | 136     | 99      | 235   |
| No. of snake-responsive neurons   | 51      | 44      | 95    |
| No. of striking-selective neurons | 36      | 28      | 64    |

The proportions of snake-responsive neurons among the mPFC neurons were not significantly different between the two monkeys [ $\chi^2$ -test;  $\chi^2(1) = 1.147$ ,  $p = 0.284$ ]. Furthermore, the proportions of striking-selective neurons among the mPFC neurons were not significantly between the two monkeys [ $\chi^2$ -test;  $\chi^2(1) = 0.095$ ,  $p = 0.758$ ].
